# Supplementary material
Source: HighWire-hosted journal article supplement (http://d2538ggaoe6cji.cloudfront.net/highwire/filestream/32042/field_highwire_adjunct_files/0/110767-1.pdf)
Supplement: 110767-1.pdf [file 110767-1.pdf]

## Supplementary Material

We have presented the bias, RMSE, coverage and efficiency plots for aggregated forecast,  $\mathcal{R}_0$ , MGI,  $P_{\text{eff}}$ , and  $P_{\text{rep}}$ . Here, we are showing the other parameters ( $G_S$ ,  $G_P$ ,  $\delta_P$  and  $\delta_{\text{obs}}$ ) and disaggregated forecast (five forecast steps) that are excluded in the main text.

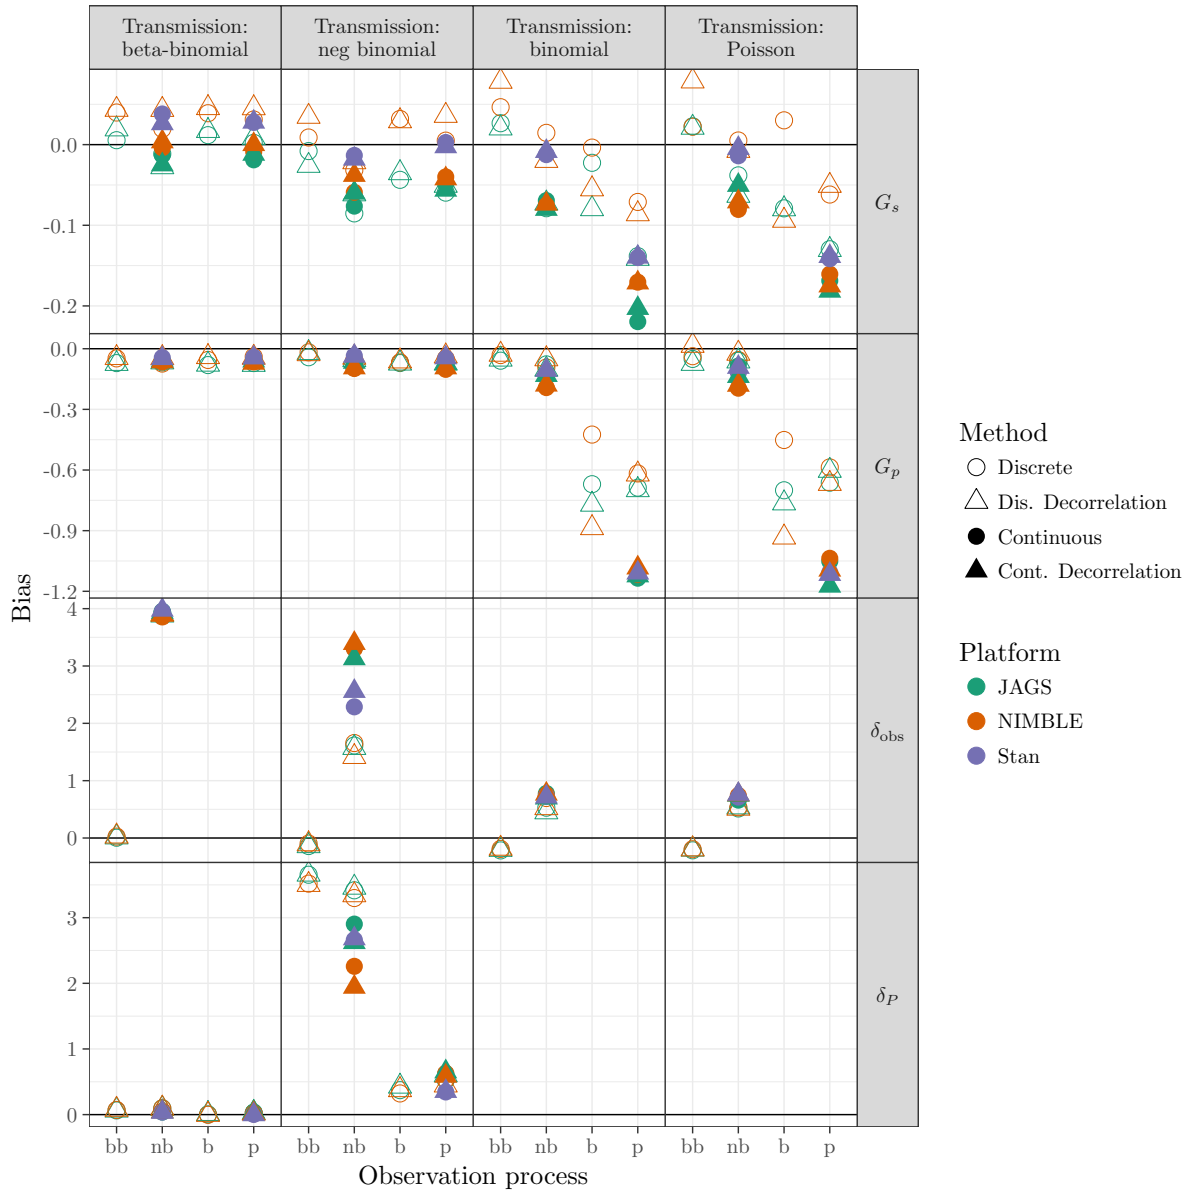

Figure S1: Comparison of bias for  $G_S$ ,  $G_P$ ,  $\delta_{obs}$ , and  $\delta_P$  described in Sect. 2.2 across different platforms described in Sect. 2.3.1.  $\delta_P$  is only applicable in models with dispersion in the transmission process (first and second left column panel) and  $\delta_{obs}$  is only applicable in models with dispersion in the observation process (first and second column within each column panel).

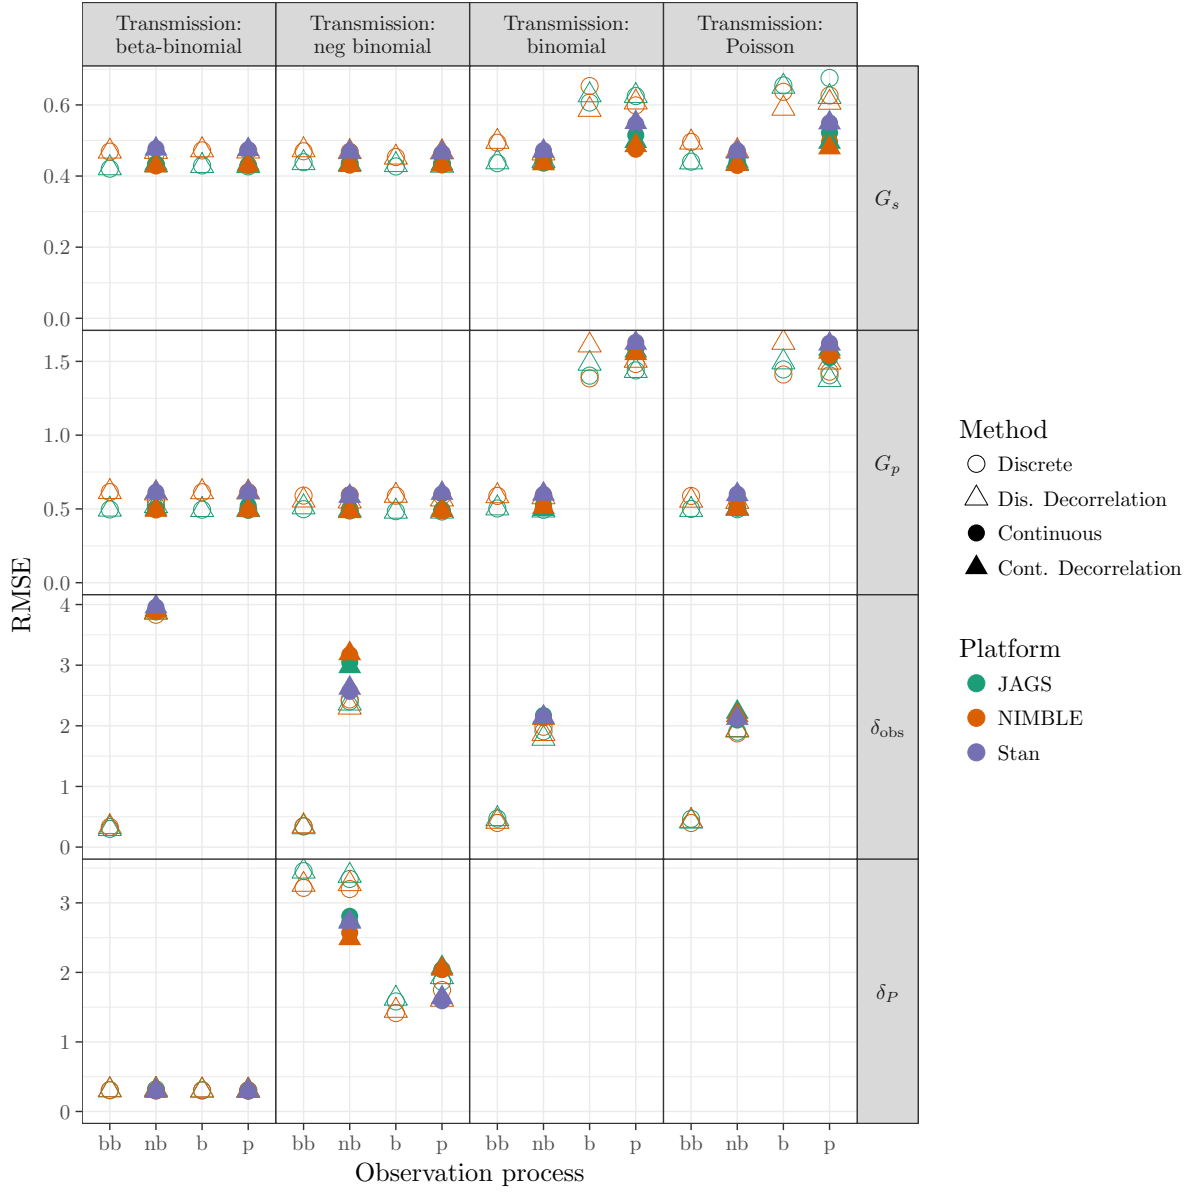

Figure S2: Comparison of RMSE for  $G_S$ ,  $G_P$ ,  $\delta_{obs}$ , and  $\delta_P$ . See Figure 4 in main text and Figure S1 in appendix for details.

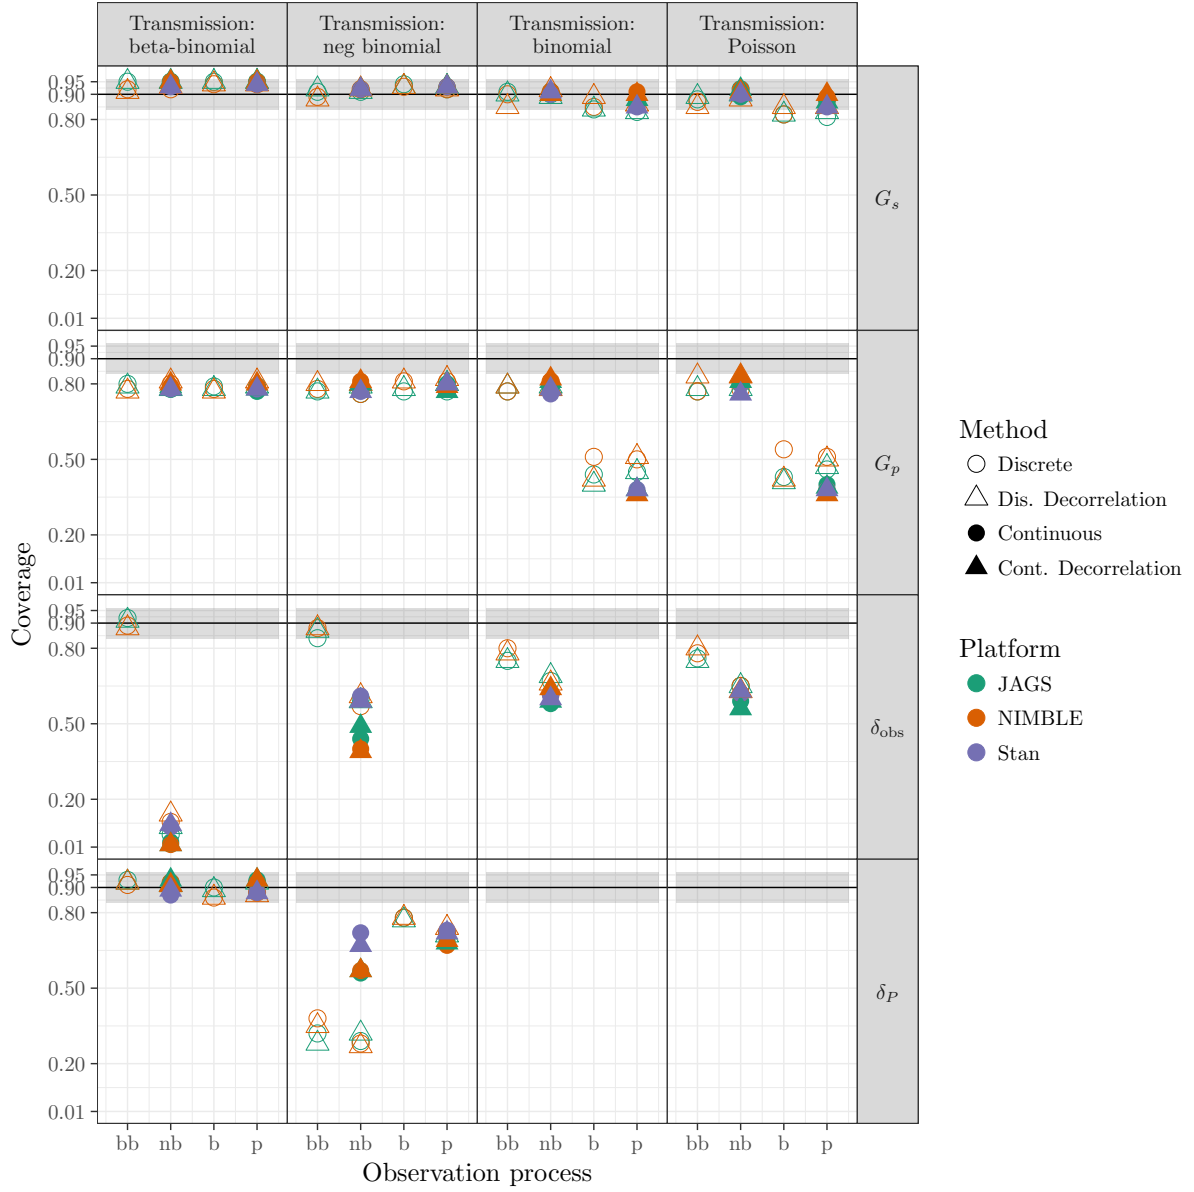

Figure S3: Comparison of coverage for  $G_S$ ,  $G_P$ ,  $\delta_{obs}$ , and  $\delta_P$ . See Figure 5 in main text and Figure S1 in appendix for details.

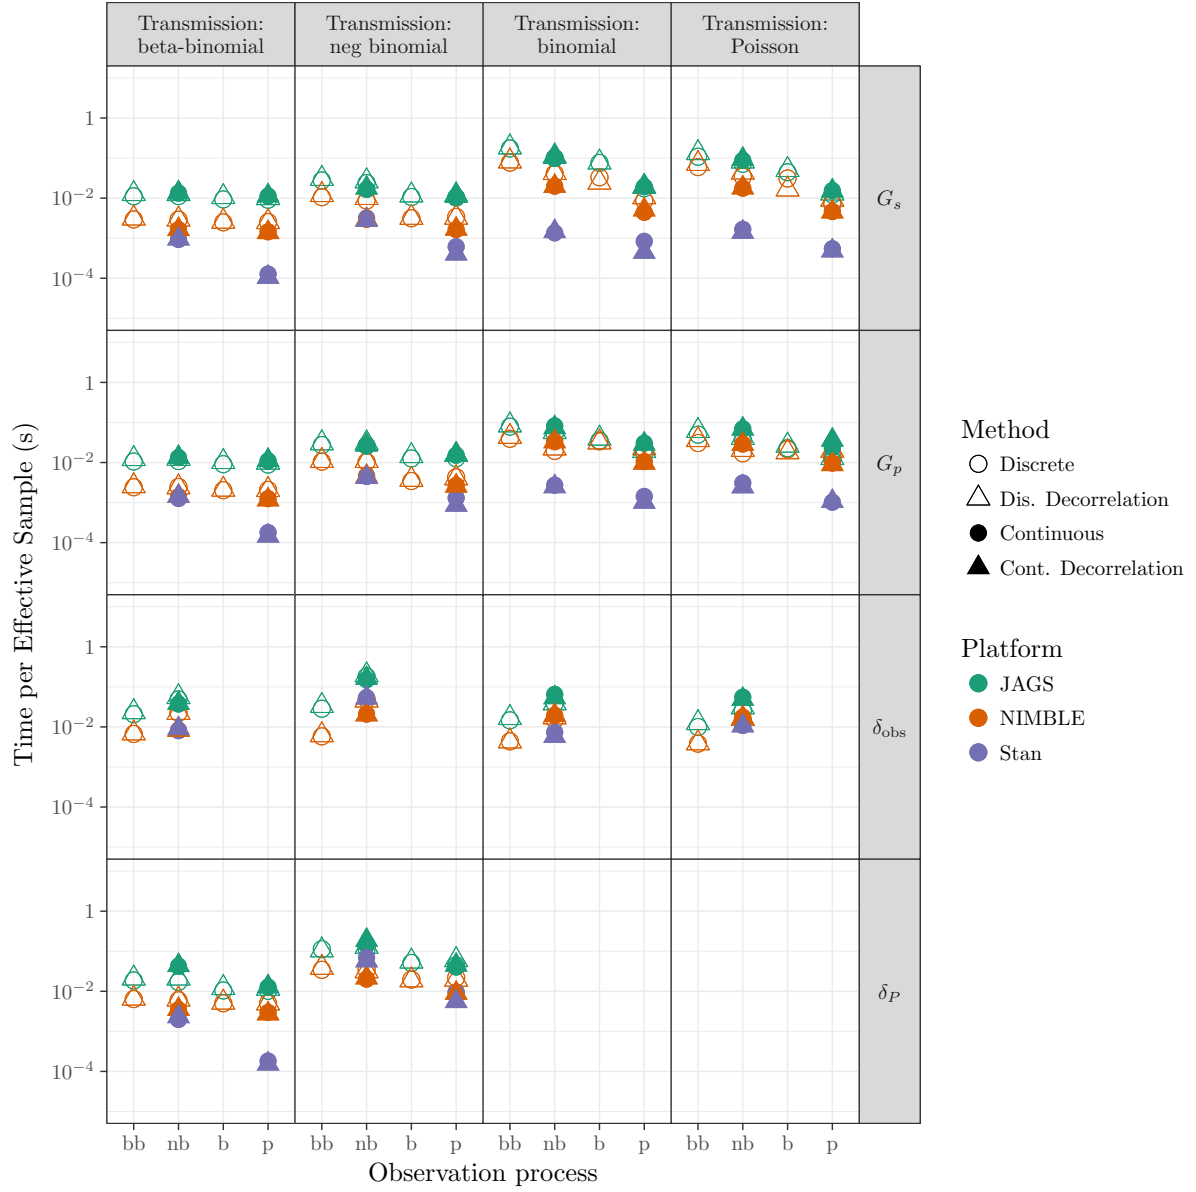

Figure S4: Comparison of coverage for  $G_S$ ,  $G_P$ ,  $\delta_{obs}$ , and  $\delta_P$ . See Figure Figure 6 in main text and Figure S1 in appendix for details.

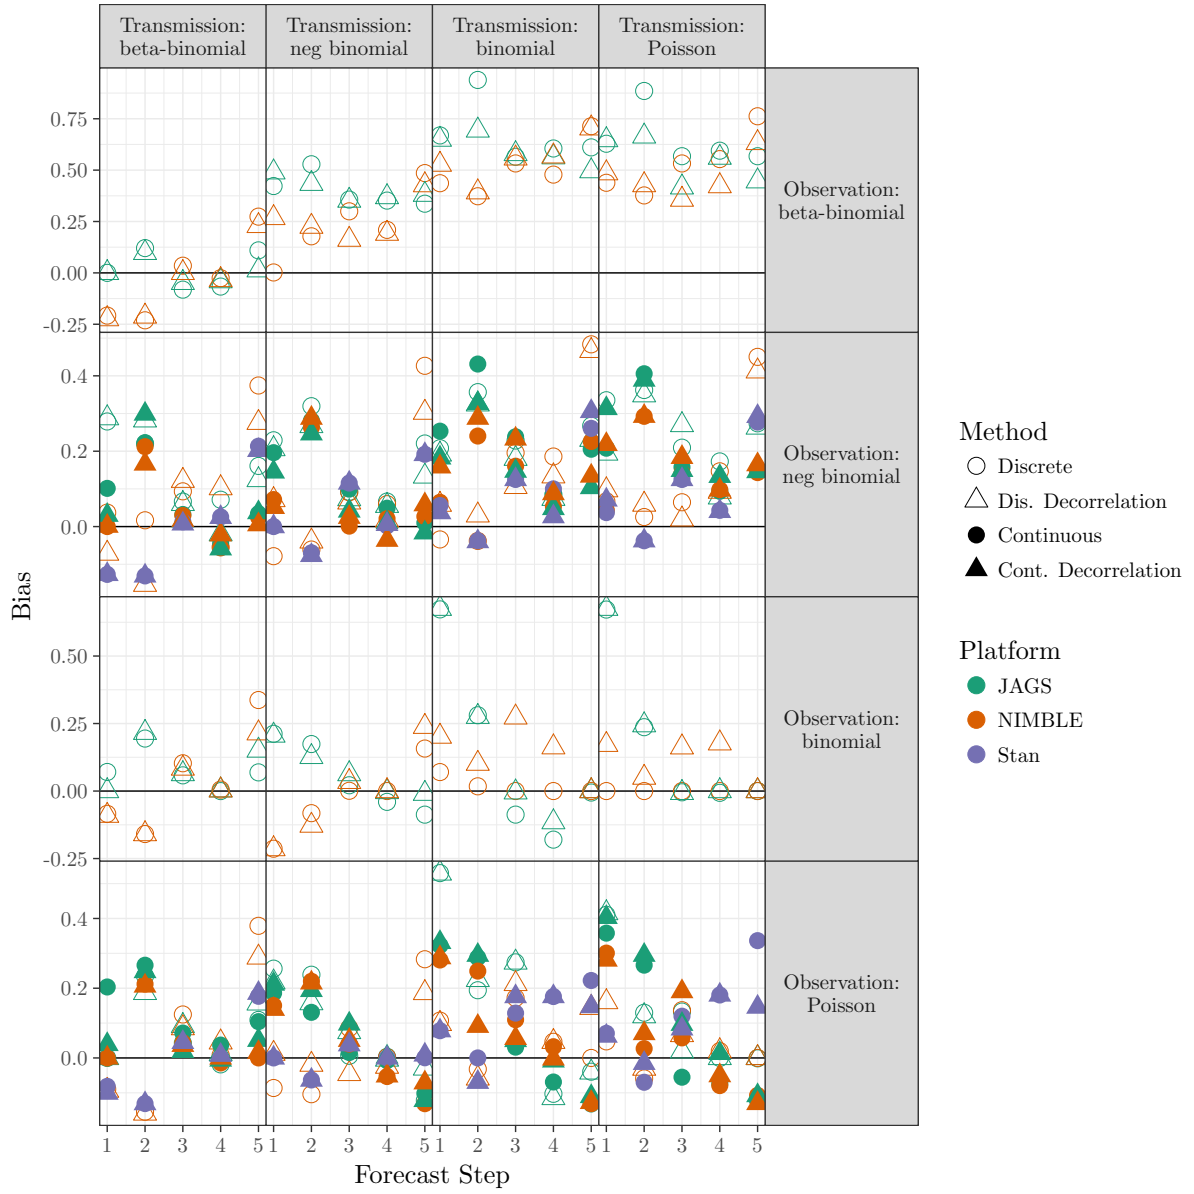

Figure S5: Comparison of bias for five forecast steps described in Sect. 2.2 across different platforms described in Sect. 2.3.1.

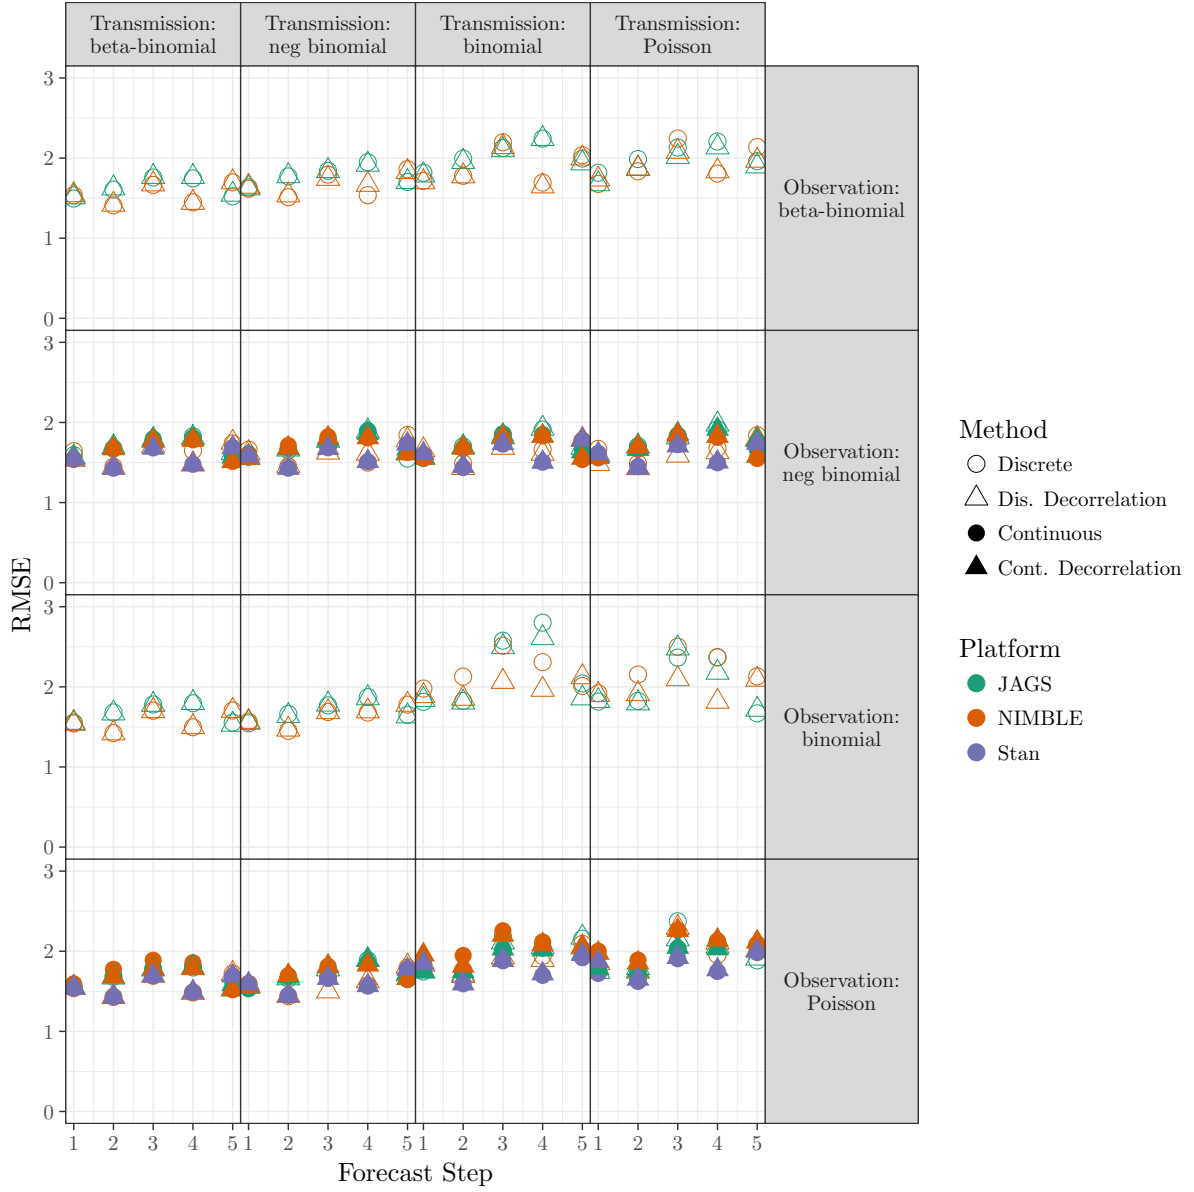

Figure S6: Comparison of rmse for five forecast steps described in Sect. 2.2 across different platforms described in Sect. 2.3.1. See Figure 4 in the main text for details.

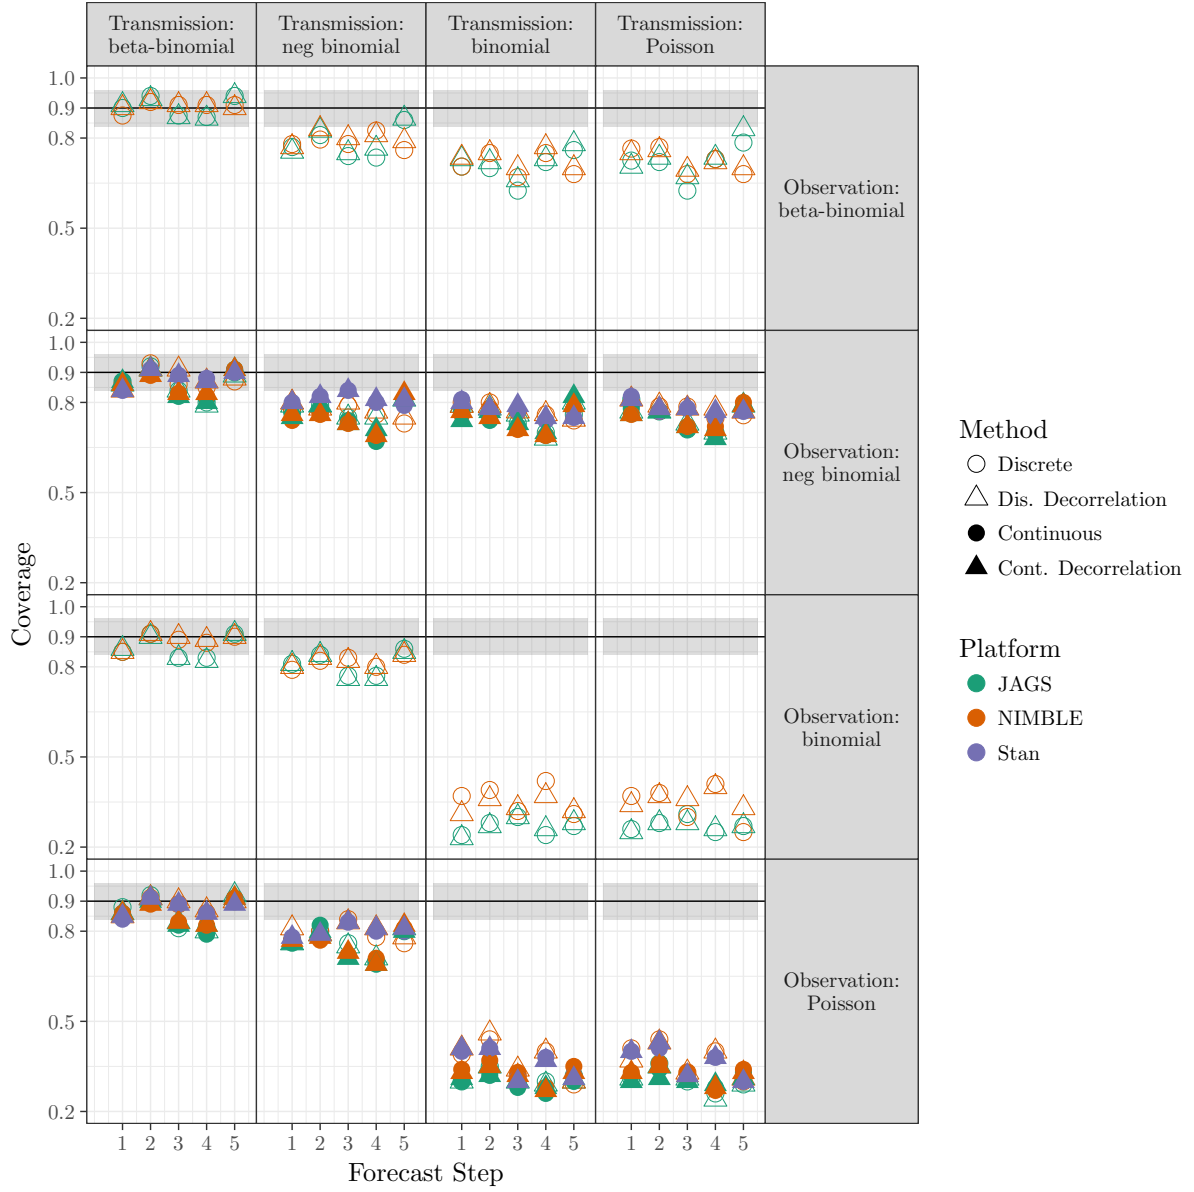

Figure S7: Comparison of coverage for five forecast steps described in Sect. 2.2 across different platforms described in Sect. 2.3.1. See Figure 5 in the main text for details.



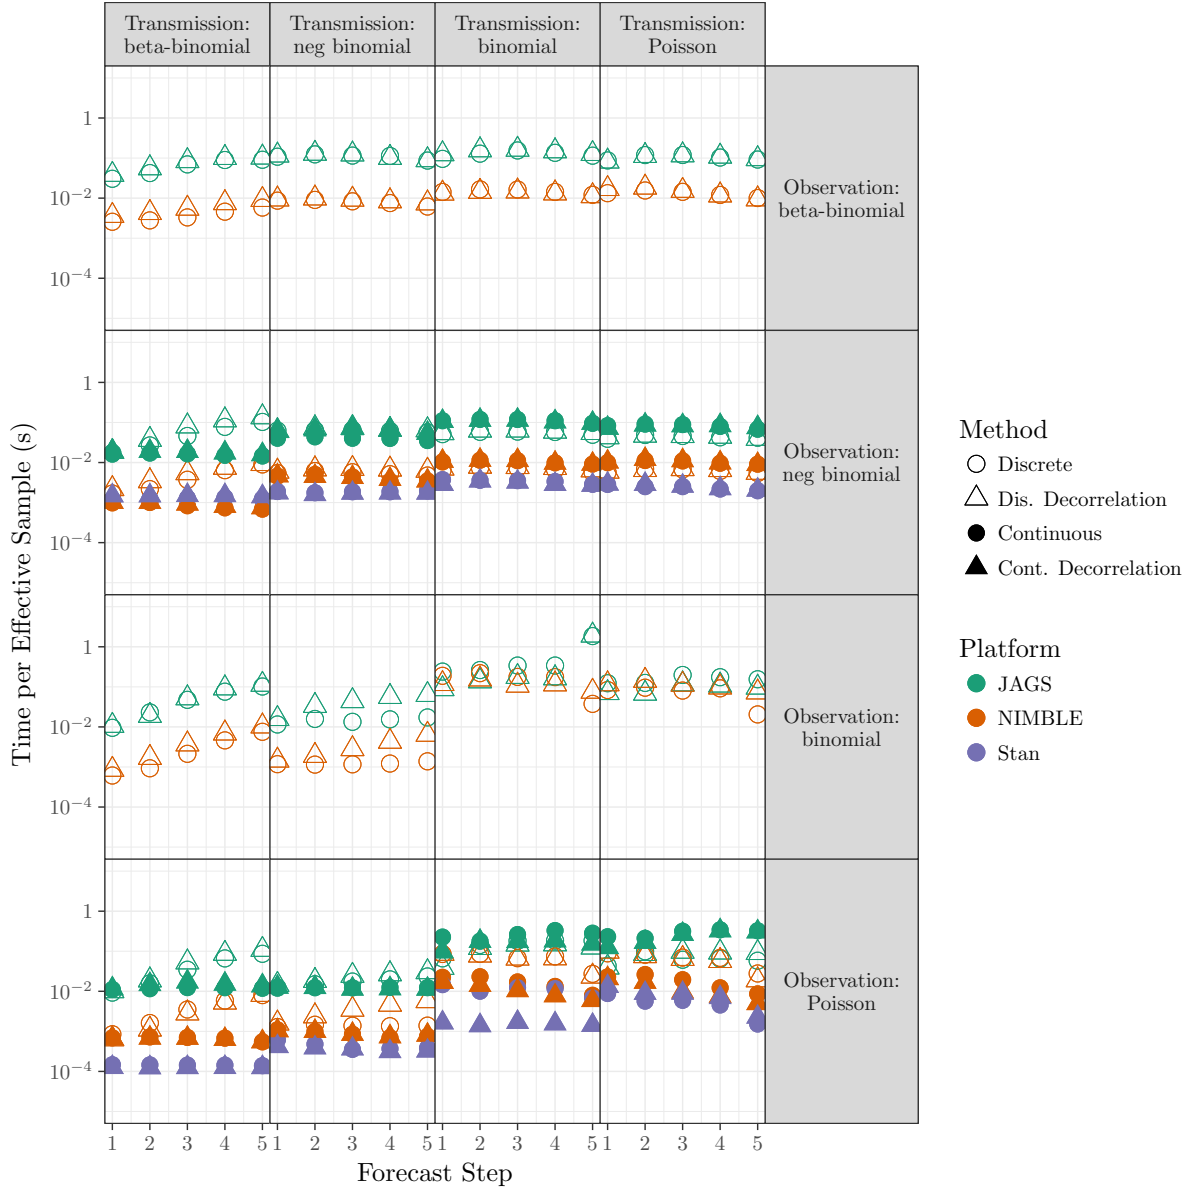

Figure S8: Comparison of efficiency for five forecast steps described in Sect. 2.2 across different platforms described in Sect. 2.3.1. See Figure 6 in the main text for details.

## Tables

Table 1: Simulation model parameters

| Parameter             | Description                                        | True                  | Prior                                                                                         |
|-----------------------|----------------------------------------------------|-----------------------|-----------------------------------------------------------------------------------------------|
| $N$                   | Total population size                              | Fixed at 100,000      | NA                                                                                            |
| $\ell$                | Maximum length of the generation interval          | Fixed at 5 time steps | NA                                                                                            |
| $\mathcal{R}_0$       | Basic reproductive number                          | 3                     | Gamma(shape=15,rate=5)                                                                        |
| $P_{\text{eff}}$      | Effective susceptible proportion of the population | 0.5                   | Beta( $\frac{B_{\text{size}}}{1-P_{\text{eff}}}$ , $\frac{B_{\text{size}}}{P_{\text{eff}}}$ ) |
| $P_{\text{rep}}$      | Reporting proportion                               | 0.5                   | Beta( $\frac{B_{\text{size}}}{1-P_{\text{rep}}}$ , $\frac{B_{\text{size}}}{P_{\text{rep}}}$ ) |
| $G_p$                 | Position parameter for generation interval         | 0.5                   | Beta( $\frac{2B_{\text{size}}}{1-G_p}$ , $\frac{2B_{\text{size}}}{G_p}$ )                     |
| $G_s$                 | Shape parameter for generation interval            | 1                     | Gamma(shape=5,rate=5)                                                                         |
| $\delta_P$            | Beta Binomial transmission process dispersion      | 1                     | Gamma(shape=10,rate=10)                                                                       |
| $\delta_{\text{obs}}$ | Beta-Binomial Observation process dispersion       | 1                     | Gamma(shape=10,rate=10)                                                                       |

Table 2: Fitting model parameters

| Parameter                         | Description                                        | True                                   | Prior                                                                                               |
|-----------------------------------|----------------------------------------------------|----------------------------------------|-----------------------------------------------------------------------------------------------------|
| $N$                               | Total population size                              | Fixed at 100,000                       | NA                                                                                                  |
| $\ell$                            | Maximum length of the generation interval          | Fixed at 5 time steps                  | NA                                                                                                  |
| $B_{\text{size}}$                 | Beta prior size factor                             | Fixed at 1                             | NA                                                                                                  |
| $\mathcal{R}_0$                   | Basic reproductive number                          | 3                                      | Gamma(shape=15,rate=5)                                                                              |
| $P_{\text{eff}}$                  | Effective susceptible proportion of the population | 0.5                                    | Beta( $\frac{B_{\text{size}}}{1-P_{\text{eff}}}$ , $\frac{B_{\text{size}}}{P_{\text{eff}}}$ )       |
| $P_{\text{rep}}$                  | Reporting proportion                               | 0.5                                    | Beta( $\frac{B_{\text{size}}}{1-P_{\text{rep}}}$ , $\frac{B_{\text{size}}}{P_{\text{rep}}}$ )       |
| $P_{\text{effrep}}$               | Proportion of effective S to I that are observed   | $P_{\text{eff}} \times P_{\text{rep}}$ | Beta( $\frac{B_{\text{size}}}{1-P_{\text{effrep}}}$ , $\frac{B_{\text{size}}}{P_{\text{effrep}}}$ ) |
| $\rho$                            | Scale splitting factor                             | 0.5                                    | Beta( $\frac{B_{\text{size}}}{1-\rho}$ , $\frac{B_{\text{size}}}{\rho}$ )                           |
| $G_p$                             | Position parameter for generation interval         | 0.5                                    | Beta( $\frac{2B_{\text{size}}}{1-G_p}$ , $\frac{2B_{\text{size}}}{G_p}$ )                           |
| $G_s$                             | Shape parameter for generation interval            | 1                                      | Gamma(shape=5,rate=5)                                                                               |
| $\delta_P$                        | Beta Binomial transmission process dispersion      | 1                                      | Gamma(shape=10,rate=10)                                                                             |
| $\delta_P$ (Neg-Binom)            | Negative-Binomial Transmission process dispersion  | NA                                     | Uniform(min=0,max=100)                                                                              |
| $\delta_{\text{obs}}$             | Beta-Binomial Observation process dispersion       | 1                                      | Gamma(shape=10,rate=10)                                                                             |
| $\delta_{\text{obs}}$ (Neg-Binom) | Negative-Binomial Transmission process dispersion  | NA                                     | Uniform(min=0,max=100)                                                                              |
